# Supplementary material for: Solubilization of elemental sulfur by surfactants promotes reduction to H2S by thiols
Source: Royal Society of Chemistry journal article supplement (doi:10.1039/d3cc01914d), 2023-01-01
Supplement: d3cc01914d1.pdf [file d3cc01914d1.pdf]

Supporting Information

**Solubilization of Elemental Sulfur By Surfactants Promotes Reduction to H<sub>2</sub>S by Thiols**

Arman C. Garcia and Michael D. Pluth\*

Department of Chemistry and Biochemistry, Materials Science Institute, Knight Campus for Accelerating Scientific Impact, and Institute of Molecular Biology, University of Oregon, Eugene, Oregon, 97403-1252. United States

\*pluth@uoregon.edu

## Experimental details

**Materials and Methods.** Chemicals were used as received from Sigma Aldrich, ThermoFisher Scientific, Acros Organics, and TCI. PBS Buffer solutions were made using 1 PBS Tablet (EMD Millipore) dissolved in 1.00 L of Millipore water to provide a pH=7.4 buffered solution with 10 mM phosphate, 140 mM NaCl, and 3 mM KCl. Buffered solutions were sparged with N<sub>2</sub> to remove dissolved oxygen and stored in an N<sub>2</sub> filled glovebox. UV-vis spectra were recorded on an Agilent Cary 60 UV-vis spectrometer equipped with a Quantum Northwest TC-1 temperature controller set at 25 ± 0.005 °C. H<sub>2</sub>S measurements were performed using a SULF-500 Type 1 Unisense electrode (extended tip - 12 cm) connected to a Unisense H<sub>2</sub>S UniAmp.

**Solubilization of S<sub>8</sub> by Surfactants.** Scintillation vials containing a 10-20 mL solution of surfactant (100 mM) in pH 7.4 PBS buffer was stirred with excess S<sub>8</sub> (200 mg, 0.008 mmol) for 1 hour. After stirring, the heterogeneous mixture was filtered using 0.1 µm Whatman syringe filters to remove excess S<sub>8</sub>. Solubilized S<sub>8</sub> was quantified by UV-vis spectroscopy by using the absorbance wavelength and extinction coefficient for S<sub>8</sub> ( $\lambda_{\text{max}} = 263 \text{ nm}$ ,  $\epsilon = 6730 \text{ M}^{-1}$  or  $\lambda_{\text{max}} = 325 \text{ nm}$ ,  $\epsilon = 1040 \text{ M}^{-1}$  for Triton-X100)

**General Procedure for H<sub>2</sub>S Calibration.** NaSH (5.6 mg, 0.10 mmol) was degassed with N<sub>2</sub> for three 1-minute cycles and dissolved with 1 mL N<sub>2</sub> sparged PBS buffer to generate a 10 mM NaSH solution, which was then diluted to 1 mM. The Unisense SULF-500 electrode tip was placed in a 20 mL solution of PBS buffer and allowed to stabilize. With a stable signal, the tip was placed through a rubber septa cap in a 20 mL solution of N<sub>2</sub>-degassed PBS buffer containing 100 mM surfactant containing 1 mM thiol (Cys, GSH, Hcy, or NAC) and allowed to stabilize prior to additions of 1 mM NaSH (5, 10, 20, 40, 60, 80, 100 µL). Calibration curves were performed daily for all H<sub>2</sub>S measurements.

**General Procedure for H<sub>2</sub>S Measurements.** A Unisense electrode was connected to a Unisense H<sub>2</sub>S UniAmp and allowed the electrode to stabilize. The electrode tip is then submerged into the desired solution until the response stabilized (<15 mV), which was typically less than 15 minutes. Once the electrode had stabilized, a solution of desired surfactant and solubilized S<sub>8</sub> was prepared was again allowed to stabilize. With a stable signal the desired thiol (50-1000 µM) was injected and H<sub>2</sub>S release was monitored. Each trial was repeated in triplicate.

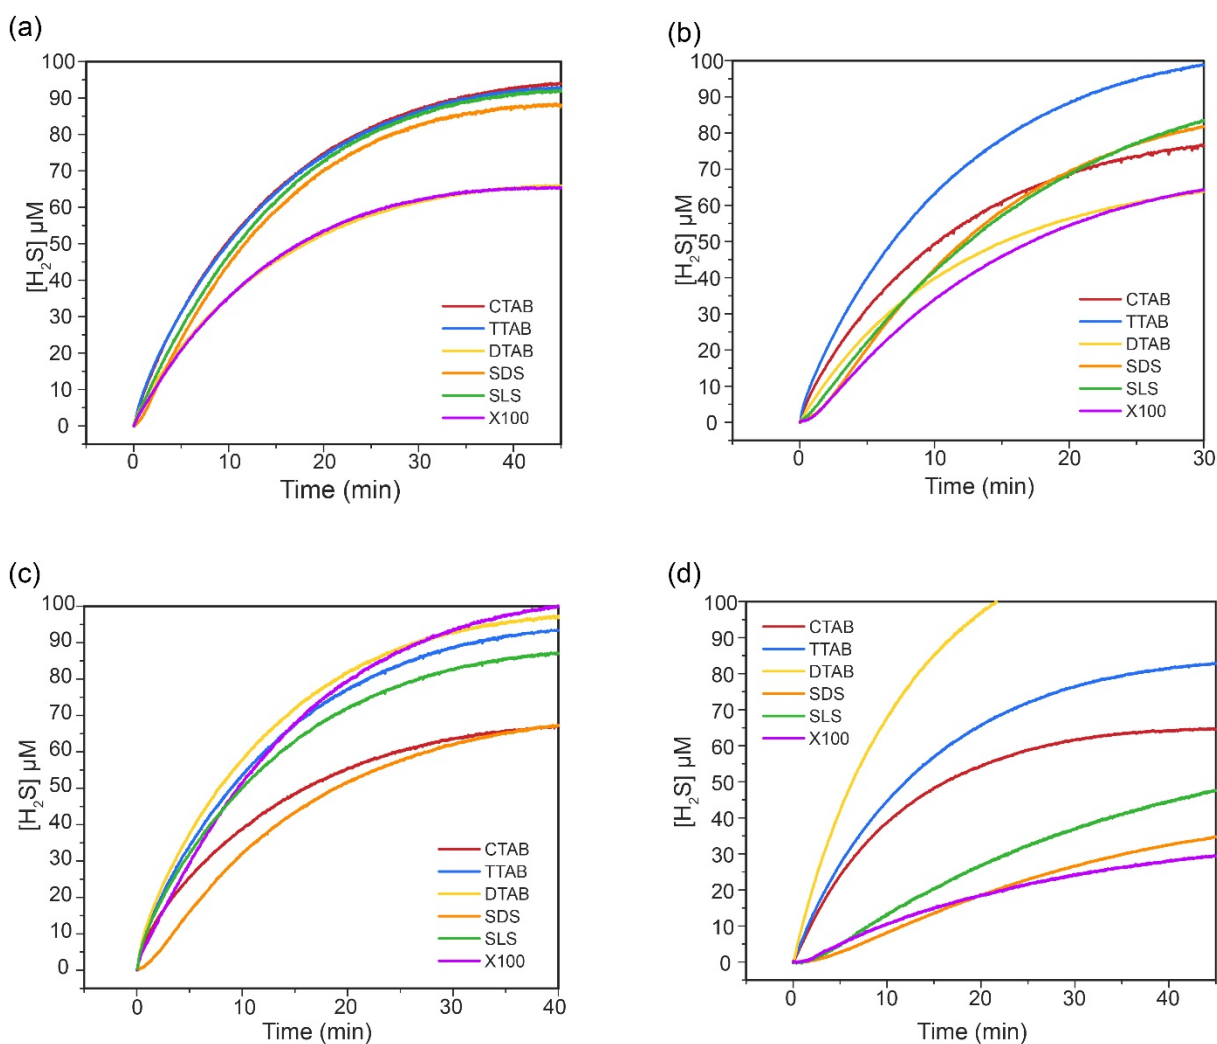

**Figure S1.**  $\text{H}_2\text{S}$  release of (80  $\mu\text{M}$ )  $\text{S}^0$  from thiol (1 mM, 12.5 equiv.) in each surfactant (100 mM) a) cysteine b) glutathione c) homocysteine and d) N-acetyl cysteine

| Surfactant  | Carbon Chain Length | $[\text{S}_8]$ Avg. mM + Std. Dev. |
|-------------|---------------------|------------------------------------|
| CTAB        | 16                  | $0.15 \pm 0.0020$                  |
| TTAB        | 14                  | $0.099 \pm 0.0037$                 |
| DTAB        | 12                  | $0.044 \pm 0.0052$                 |
| SDS         | 12                  | $0.065 \pm 0.0050$                 |
| SLS         | 11                  | $0.053 \pm 0.0015$                 |
| Triton-X100 | 27-30               | $0.250 \pm 0.032$                  |

**Table S1.** Solubilized  $\text{S}_8$  by surfactant (100 mM) in PBS Buffer (pH=7.4). UV-Vis spectra were baselined to stock solutions of respective surfactant and then  $\text{S}_8$  was quantified. ( $\text{S}_8$  measured at  $\lambda_{\text{max}}$  at 263 nm (at 295 nm for Triton-X100 due to absorbance overlap)).

|              | Thiol – Avg. H <sub>2</sub> S Release + Std. Dev. (±) |           |           |           |
|--------------|-------------------------------------------------------|-----------|-----------|-----------|
| Surfactant   | Cys                                                   | Hcy       | GSH       | NAC       |
| CTAB         | 78 ± 10                                               | 67 ± 1.8  | 78 ± 4.4  | 73 ± 2.2  |
| TTAB         | 92 ± 1.7                                              | 94 ± 3.0  | 101 ± 1.5 | 82 ± 2.1  |
| DTAB         | 66 ± 2.2                                              | 98 ± 4.9  | 73 ± 9.0  | 112 ± 5.5 |
| SDS          | 88 ± 2.7                                              | 69 ± 0.7  | 86 ± 9.6  | 42 ± 3.2  |
| SLS          | 92 ± 5.8                                              | 105 ± 3.4 | 91 ± 5.8  | 61 ± 2.9  |
| Triton -X100 | 65 ± 4.9                                              | 101 ± 1.1 | 68 ± 5.8  | 35 ± 2.9  |

**Table S2.** H<sub>2</sub>S release from surfactant/S<sub>8</sub> + thiols

|              | <i>k</i> <sub>obs</sub> (s <sup>-1</sup> ) |                         |                         |                         |
|--------------|--------------------------------------------|-------------------------|-------------------------|-------------------------|
| Surfactant   | Cys                                        | Hcy                     | GSH                     | NAC                     |
| CTAB         | 7.01 × 10 <sup>-3</sup>                    | 3.76 × 10 <sup>-3</sup> | 5.67 × 10 <sup>-3</sup> | 6.71 × 10 <sup>-3</sup> |
| TTAB         | 6.07 × 10 <sup>-3</sup>                    | 4.84 × 10 <sup>-3</sup> | 4.30 × 10 <sup>-3</sup> | 6.76 × 10 <sup>-3</sup> |
| DTAB         | 6.36 × 10 <sup>-3</sup>                    | 4.13 × 10 <sup>-3</sup> | 4.07 × 10 <sup>-3</sup> | 5.69 × 10 <sup>-3</sup> |
| SDS          | 8.51 × 10 <sup>-3</sup>                    | 4.70 × 10 <sup>-3</sup> | 4.10 × 10 <sup>-3</sup> | 8.37 × 10 <sup>-3</sup> |
| SLS          | 6.65 × 10 <sup>-3</sup>                    | 4.59 × 10 <sup>-3</sup> | 5.70 × 10 <sup>-3</sup> | 2.24 × 10 <sup>-3</sup> |
| Triton -X100 | 8.42 × 10 <sup>-3</sup>                    | 4.09 × 10 <sup>-3</sup> | 2.83 × 10 <sup>-3</sup> | 1.35 × 10 <sup>-3</sup> |

**Table S3.** Rate of H<sub>2</sub>S formation from surfactant (100 mM)/S<sub>8</sub> (10 μM S<sub>8</sub>, 80 μM S<sup>0</sup>) with added thiol (100 equiv.)
